# Supplementary material for: Surgical management of tricuspid regurgitation: a new algorithm to minimise recurrent tricuspid regurgitation
Source: PubMed Central journal article supplement — Open Heart. 2022 Jul 25;9(2):e002011. doi: 10.1136/openhrt-2022-002011 (PMC9328083; doi:10.1136/openhrt-2022-002011), 2022-07-25
Supplement: openhrt-2022-002011supp001.pdf [file openhrt-2022-002011supp001.pdf]

**SUPPLEMENTARY MATERIAL**

Table 1. Comparison of complications between repair and prosthesis groups

|                                        | Repair | Prosthesis | Significance |
|----------------------------------------|--------|------------|--------------|
| <b>EARLY COMPLICATIONS</b>             |        |            |              |
| <i>De novo atrial fibrillation (%)</i> | 9.8    | 10.4       | 0.14         |
| Acute myocardial infarction(%)         | 4.9    | 6.7        | 0.62         |
| Ischemic stroke (%)                    | 3.2    | 6.7        | 0.47         |
| Heart failure (%)                      | 11.5   | 13.3       | 0.52         |
| Pericardial effusion (%)               | 13.1   | 6.7        | 0.47         |
| Kidney failure (%)                     | 37.7   | 53.3       | 0.17         |
| Death (%)                              | 2.2    | 6.7        | 0.27         |
| <b>LATE COMPLICATIONS</b>              |        |            |              |
| <i>De novo atrial fibrillation (%)</i> | 9.5    | 6.7        | 0.6          |
| Acute myocardial infarction(%)         | 1.6    | 6.7        | 0.73         |
| Ischemic stroke (%)                    | 1.6    | 6.7        | 0.7          |
| Heart failure (%)                      | 15.9   | 28.6       | 0.24         |

|                            |      |      |      |
|----------------------------|------|------|------|
| Pericardial effusion (%)   | 3.2  | 6.7  | 0.38 |
| Kidney failure (%)         | 8.6  | 13.3 | 0.53 |
| Pacemaker implantation (%) | 14.3 | 20   | 0.07 |
| Death (%)                  | 2.3  | 6.7  | 0.47 |

Table 2: Quantitative variables associated with TR outcome

|                                     | TR outcome  | Mean    | P    |
|-------------------------------------|-------------|---------|------|
| Maximum aortic gradient             | Unfavorable | 15.33   | 0,52 |
|                                     | Favorable   | 19.55   |      |
| Mean aortic gradient                | Unfavorable | 8.00    | 0,37 |
|                                     | Favorable   | 11.7    |      |
| Left ventricle diameter             | Unfavorable | 51.17   | 0,65 |
|                                     | Favorable   | 49.79   |      |
| Left ventricle end-diastolic volume | Unfavorable | 99.00   | 0,92 |
|                                     | Favorable   | 100.57  |      |
| Left ventricle end-systolic volume  | Unfavorable | 43.0000 | 0,83 |
|                                     | Favorable   | 45.1481 |      |
| LVEF (biplane Simpson)              | Unfavorable | 62.33   | 0,35 |
|                                     | Favorable   | 58.71   |      |
| Ejection volume                     | Unfavorable | 58,5    | 0,73 |
|                                     | Favorable   | 55,47   |      |
| Lateral annulus systolic velocity   | Unfavorable | .0800   | 0,68 |
|                                     | Favorable   | .0755   |      |
| Medial annulus systolic velocity    | Unfavorable | .0580   | 0,91 |
|                                     | Favorable   | .0572   |      |
| Mitral filling E wave               | Unfavorable | 1,306   | 0,17 |
|                                     | Favorable   | 1,703   |      |
| Left biplane atrial volume          | Unfavorable | 91.0406 | 0,3  |
|                                     | Favorable   | 80.1567 |      |
| Left atrial longitudinal diameter   | Unfavorable | 55.67   | 0.4  |
|                                     | Favorable   | 52.55   |      |
| E/A ratio                           | Unfavorable | 10      | 0,4  |
|                                     | Favorable   | 14,68   |      |
| E/e' ratio                          | Unfavorable | 12.8    | 0,23 |
|                                     | Favorable   | 19.61   |      |
| Tricuspid mean gradient             | Unfavorable | 2.33    | 0,95 |
|                                     | Favorable   | 2.38    |      |
| Vena contracta                      | Unfavorable | 7       | 0.44 |
|                                     | Favorable   | 8.21    |      |
| PISA radius                         | Unfavorable | 7.75    | 0.94 |
|                                     | Favorable   | 7.63    |      |
| Regurgitating volume                | Unfavorable | 49.33   | 0.67 |
|                                     | Favorable   | 44.29   |      |
| Tricuspid annulus diameter          | Unfavorable | 42.83   | 0,52 |
|                                     | Favorable   | 41.65   |      |
| Tenting area                        | Unfavorable | 2.24    | 0,41 |
|                                     | Favorable   | 1.61    |      |
| Tenting distance                    | Unfavorable | 8,83    | 0.38 |

|                                     |             |         |      |
|-------------------------------------|-------------|---------|------|
|                                     | Favorable   | 7.4962  |      |
| Right ventricle basal diameter      | Unfavorable | 50.33   | 0.7  |
|                                     | Favorable   | 49.00   |      |
| Right ventricle mid diameter        | Unfavorable | 39.50   | 0.67 |
|                                     | Favorable   | 37.91   |      |
| Right ventricle fraction shortening | Unfavorable | 49.5    | 0.07 |
|                                     | Favorable   | 38.77   |      |
| TAPSE                               | Unfavorable | 22.50   | 0.05 |
|                                     | Favorable   | 18.71   |      |
| Tricuspid annulus systolic velocity | Unfavorable | .1233   | 0.39 |
|                                     | Favorable   | .1115   |      |
| Lateral wall longitudinal strain    | Unfavorable | -23.25  | 0.13 |
|                                     | Favorable   | -19.44  |      |
| Right atrial longitudinal diameter  | Unfavorable | 71.00   | 0.99 |
|                                     | Favorable   | 71.06   |      |
| Right atrial transverse diameter    | Unfavorable | 52.20   | 0.87 |
|                                     | Favorable   | 53.20   |      |
| Right biplane atrial volume         | Unfavorable | 64.5914 | 0.66 |
|                                     | Favorable   | 74.8892 |      |
| Inferior vena cava diameter         | Unfavorable | 26.40   | 0.26 |
|                                     | Favorable   | 22.11   |      |
| RV-RA gradient                      | Unfavorable | 32.83   | 0.46 |
|                                     | Favorable   | 37.24   |      |
| Systolic pulmonary artery pressure  | Unfavorable | 52.00   | 0.94 |
|                                     | Favorable   | 51.51   |      |
| Right atrial pressure               | Unfavorable | 14.00   | 0.4  |
|                                     | Favorable   | 12.78   |      |

TR: tricuspid regurgitation; LVEF: left ventricular ejection fraction, PISA: proximal isovelocity surface area;

TAPSE: tricuspid annular plane systolic excursion; RV: right ventricle; RA: right atrium

Table 3: Qualitative variables associated with TR outcome

|                                                                      | TR outcome  | Percentage | P    |
|----------------------------------------------------------------------|-------------|------------|------|
| Sex (female)                                                         | Unfavorable | 83.3%      | 0,54 |
|                                                                      | Favorable   | 74.50%     |      |
| Hypertension                                                         | Unfavorable | 83.30%     | 0,14 |
|                                                                      | Favorable   | 50.90%     |      |
| Previous stroke                                                      | Unfavorable | 33.30%     | 0,17 |
|                                                                      | Favorable   | 10.90%     |      |
| Previous ischemic heart disease                                      | Unfavorable | 16.70%     | 0,7  |
|                                                                      | Favorable   | 7.30%      |      |
| Previous right ventricular function<br>(normal by visual estimation) | Unfavorable | 66.70%     | 0,15 |
|                                                                      | Favorable   | 83.60%     |      |
| Diabetes mellitus                                                    | Unfavorable | 0.00%      | 0,29 |
|                                                                      | Favorable   | 20.00%     |      |
| COPD                                                                 | Unfavorable | 33.30%     | 0,1  |
|                                                                      | Favorable   | 7.30%      |      |
| Previous left ventricular function<br>(normal)                       | Unfavorable | 83.30%     | 0,9  |
|                                                                      | Favorable   | 85.50%     |      |
| Previous atrial fibrillation                                         | Unfavorable | 33.30%     | 0,63 |
|                                                                      | Favorable   | 18.20%     |      |
| Previous heart valve prosthesis                                      | Unfavorable | 16.70%     | 0,8  |
|                                                                      | Favorable   | 32.70%     |      |
| Right heart failure                                                  | Unfavorable | 50.00%     | 0,55 |
|                                                                      | Favorable   | 43.60%     |      |
| Tricuspid regurgitation etiology                                     | Unfavorable | 100.00%    | 0.54 |
|                                                                      | Favorable   | 73.60%     |      |

TR: tricuspid regurgitation; COPD: chronic obstructive pulmonary disease

Table 4: Early mortality predictors. Multivariate analysis.

| Early mortality predictors | OR   | CI (95%)    | P    |
|----------------------------|------|-------------|------|
| LVEF (biplane Simpson)     | 0.81 | 0.676-0.985 | 0,03 |
| Clamping time (min)        | 1.24 |             | 0,72 |
| EUROSCORE                  | 1.49 |             | 0,78 |
| Hypertension               | 1.19 |             | 0,22 |
| Stroke                     | 1.6  |             | 0,41 |
| Coronary heart disease     | 1.2  |             | 0,68 |
| Constant                   | 2.62 |             | 0,77 |

LVEF: left ventricular ejection fraction

Table 5: Late mortality predictors. Multivariate analysis.

| Late mortality predictors | OR    | CI (95%)    | P    |
|---------------------------|-------|-------------|------|
| LVEF (biplane Simpson)    | 0.025 | 0.657-0.841 | 0,01 |
| Follow-up complications   | 1.41  |             | 0,82 |
| Hypertension              | 1.83  |             | 0,38 |
| Stroke                    | 2.42  |             | 0,21 |
| Coronary heart disease    | 1.1   |             | 0,47 |
| Constant                  | 2     |             | 0,57 |

LVEF: left ventricular ejection fraction

Table 6: Tricuspid regurgitation predictors. Multivariate analysis.

| TR predictors                                    | OR    | P    |
|--------------------------------------------------|-------|------|
| LVEF (biplane Simpson)                           | .000  | ,984 |
| Tenting area                                     | .480  | ,488 |
| Tenting distance                                 | .612  | ,434 |
| TAPSE                                            | .037  | ,847 |
| Tricuspid lateral systolic peak S' wave velocity | .071  | ,790 |
| Right ventricular strain                         | .567  | ,452 |
| RVEF by visual estimation                        | .490  | ,484 |
| Tricuspid regurgitation etiology                 | .782  | ,676 |
| PISA radius                                      | 1.339 | ,247 |
| Regurgitating volume                             | .673  | ,412 |
| Regurgitant orifice                              | 2.482 | ,115 |

LVEF:left ventricular ejectionfraction; RVEF: right ventricular ejectionfraction; TAPSE: tricuspid annular plane systolic excursion; PISA: proximal isovelocity surface area ; TR: tricuspid regurgitation.
